# Supplementary material
Source: PubMed Central journal article supplement (PMC10088091)
Supplement: mmc1.pdf [file mmc1.pdf]

**Cell Reports Methods, Volume 3**

**Supplemental information**

**SEQUIN is an R/Shiny framework**

**for rapid and reproducible**

**analysis of RNA-seq data**

**Claire Weber, Marissa B. Hirst, Ben Ernest, Nicholas J. Schaub, Kelli M. Wilson, Ke Wang, Hannah M. Baskir, Pei-Hsuan Chu, Carlos A. Tristan, and Ilyas Singeç**

## **Supplemental figures and tables**

**Figure S1:** Overview of scRNA metadata analysis

**Figure S2:** UMAP dimensionality reduction plots and boxplots of gene expression by cluster

**Figure S3:** tSNE plot by original identity

**Figure S4:** scRNA tab used to group cells by gene expression

**Figure S5:** Merging scRNA clusters

**Table S1:** In-app benchmarking

**A**

Single-cell RNA-seq experiment: IS006\_WA09

Resolution: pre-computed

**Overview**

Clusters

Metadata

Gene expression

DGE

Volcano plot

Heatmap

Gene set enrichment

Manually select cells

Clustering

Merge clusters

Group cells by gene expression

**Cluster exploration****Cluster separation**

Cluster separation metric

FDR

# positive DEGs per cluster to nearest cluster

0.05

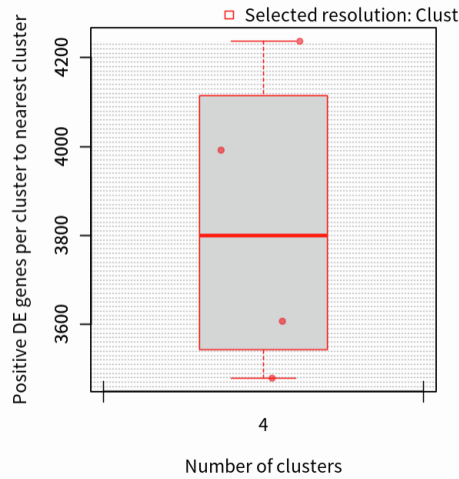

Save as PNG

**Silhouette plot**

n = 10000

4 clusters  $C_j$ 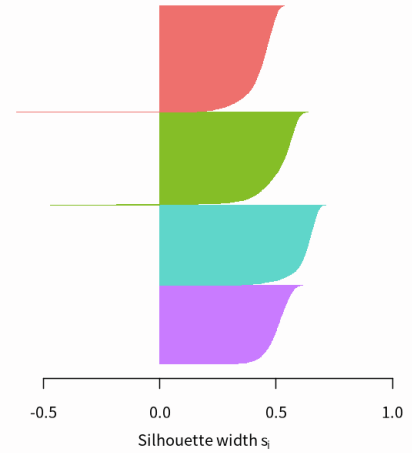

Save as PNG

**B**

Single-cell RNA-seq experiment: IS006\_WA09

Resolution: pre-computed

**Overview**

Clusters

Metadata

Gene expression

DGE

Volcano plot

Heatmap

Gene set enrichment

Manually select cells

Clustering

Merge clusters

Group cells by gene expression

**Metadata exploration****Metadata relationships**

X axis

Y axis

orig.ident

nCount\_RNA

Log y axis

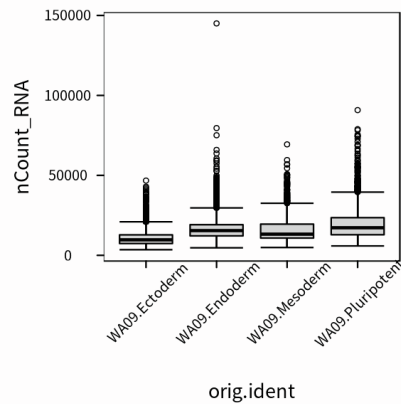

Save as PNG

**Metadata by cluster**

Metadata

Factor counts per cluster

differentiation

Absolute

Relative

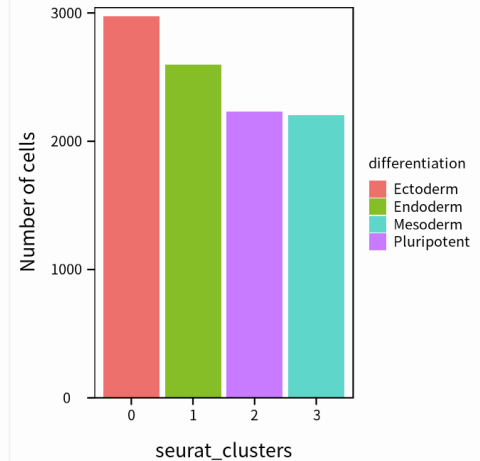

Save as PNG

**Figure S1. Overview of scRNA metadata analysis, related to figure 2.**

**A**, Exploration of cluster sizes and quality for single cell RNA-Seq analysis of IS006 (WA09). **B**, Identification of relationships between factors in the metadata.

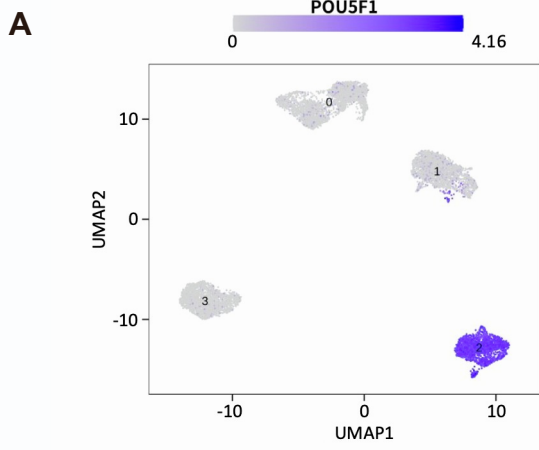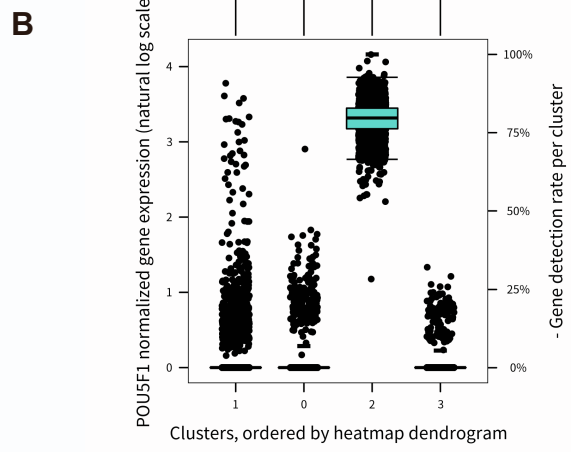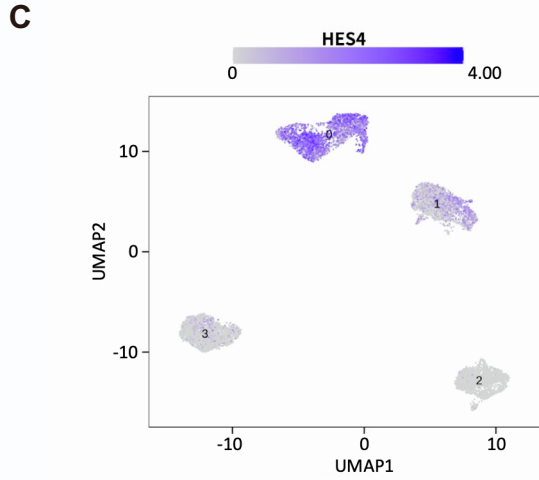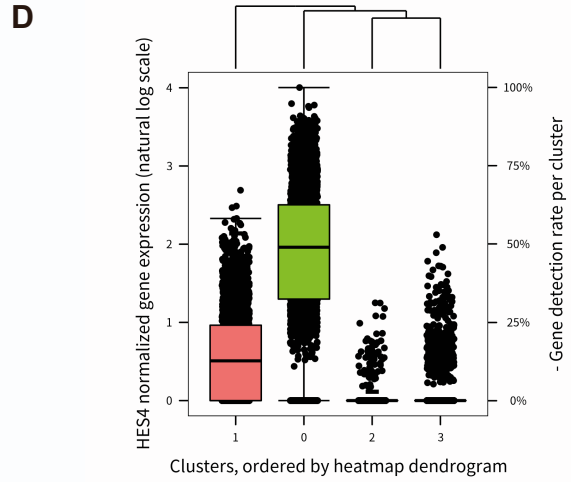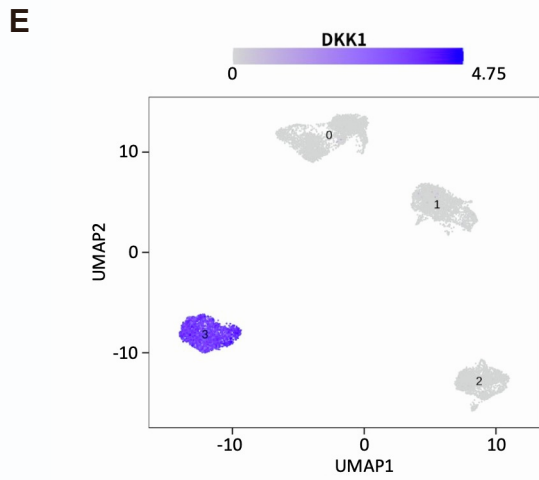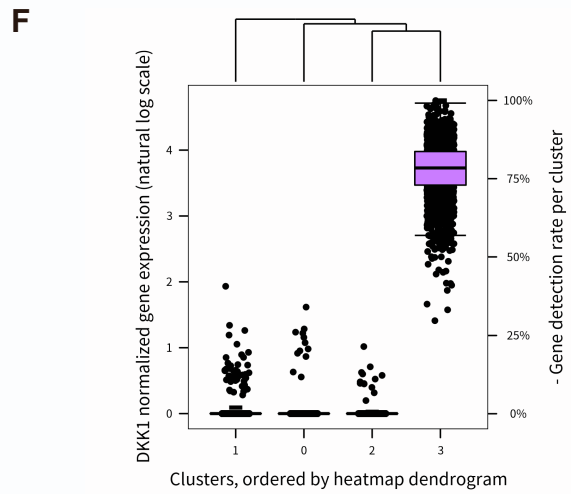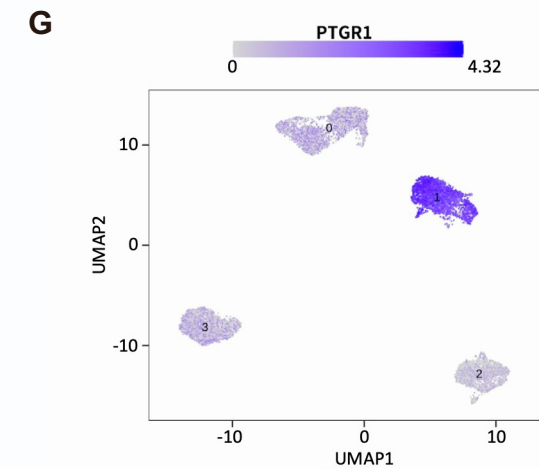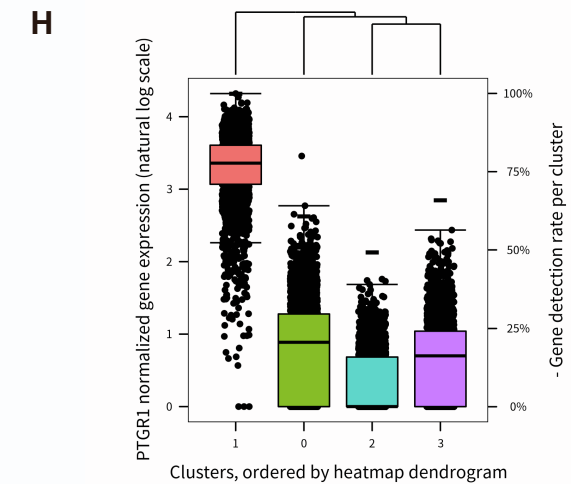

**Figure S2. UMAP dimensionality reduction plots and boxplots of gene expression by cluster, related to figure 3.**

**A, B**, Pluripotent cells (cluster 2) express POU5F1 (OCT4) in IS006 (WA09) single cell RNA-Seq analysis. **C, D**, HES4 is strongly expressed by ectodermal cells (cluster 0). **E, F**, Mesodermal cells express DKK1 (cluster 3). **G, H**, Expression of PTGR1 by endodermal cells (cluster 1).

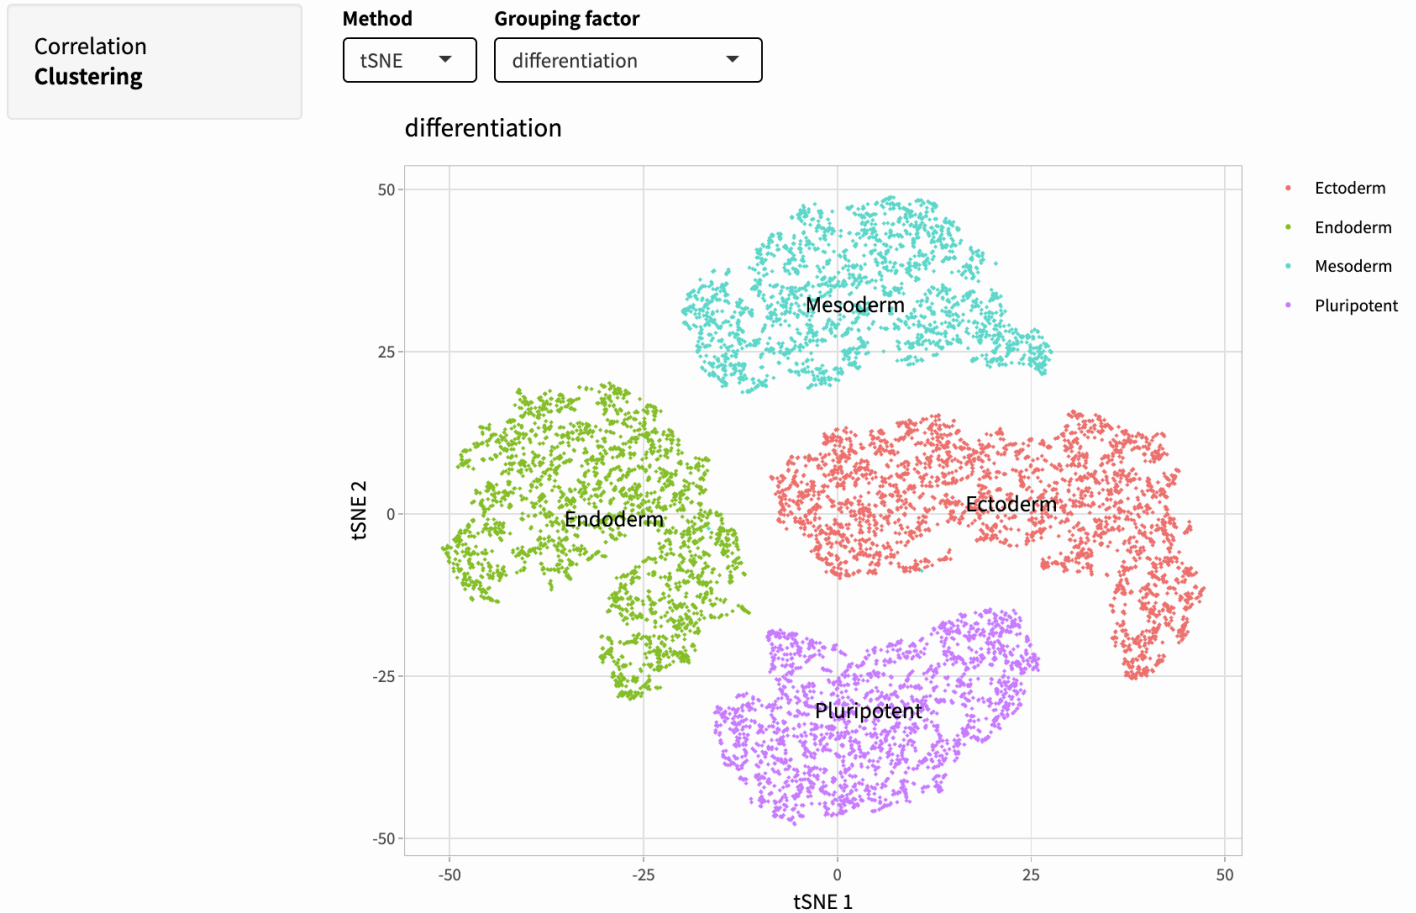

**Figure S3. tSNE plot by original identity, related to figure 3.**

A resolution of 0.1 reveals four distinct cell clusters with pluripotent, ectodermal, and endodermal, mesodermal signatures in IS006 (WA09) single cell RNA-Seq analysis.

Select resolution  
 Overview  
 Gene expression  
 DGE  
 Volcano plot  
 Heatmap  
 Gene set enrichment  
 Manually select cells  
 Clustering  
 Merge clusters  
**Group cells by gene expression**

### Group cells by gene expression

**Select genes**

**Summary metric**

**From (min 0)**

**To (max 2.67)**

Inclusive
  Inclusive

**Username**

**Comment**

**Updated table name**

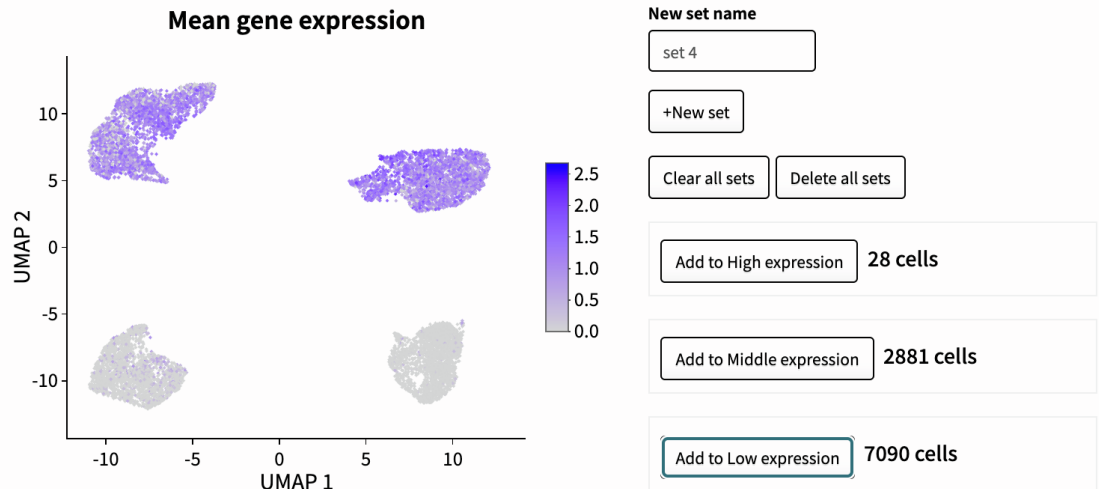

**Figure S4. scRNA tab used to group cells by gene expression, related to figures 2 and 4.** The mean of two genes per cell was selected here (SOX17 and HES4) and overlaid onto a UMAP of IS006 (WA09). The user can either lasso cells to include them in a given set or define the minimum and maximum of gene expression for the targeted genes to select those cells for a given set. After providing a username and/or description of the type of grouping, the user selects “Save to database” to automatically store the updated metadata in the RDS to be used for updated analysis.

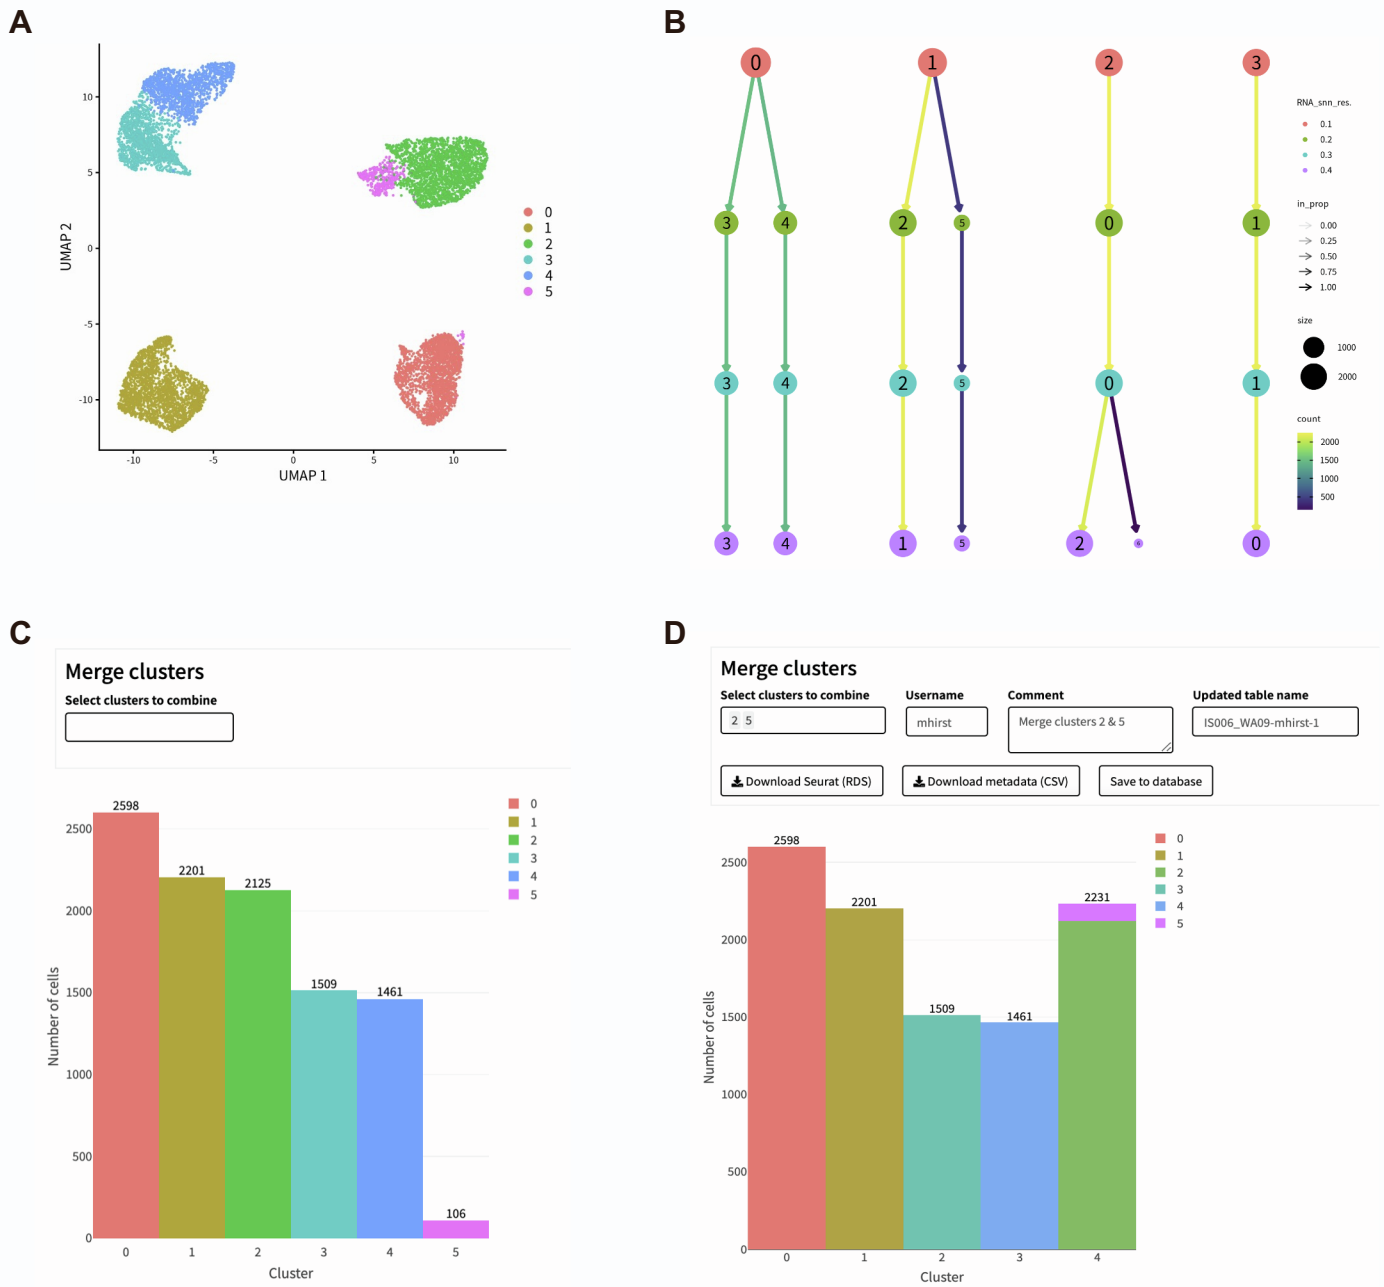

**Figure S5. Merging scRNA clusters, related to figures 2 and 4.**

**A**, UMAP of further clustering at 0.3 resolution reveals six clusters, splitting endoderm and ectoderm clusters into two in IS006 (W09). **B**, Clustree flowchart by resolutions 0.1 to 0.4 in rows showing how higher resolutions generate more clusters. **C**, Prior to selecting clusters for merging in IS006 (WA09). **D**, The merging of clusters three and four from IS006 (WA09). After providing a username and/or a comment, the user can select the “Save to database”, which will automatically store the updated metadata in the RDS to be used for updated analysis.



| Step                                             | Dataset name |            |             |             |             | Comment |
|--------------------------------------------------|--------------|------------|-------------|-------------|-------------|---------|
|                                                  | example_sc   | IS018      | IS020_WA09  | IS006_WA09  | IS006_11    |         |
| N cells                                          | 90           | 3875       | 10058       | 16582       | 19759       |         |
| Load data                                        | 8 s          | 3 min 50 s | 7 min 30 s  | 8 min 30 s  | 29 min      | 1       |
| Load data - resolutions 0.4 to 2.8 (step by 0.4) | 13 s         | 8 min 33 s | 24 min 18 s | 56 min 46 s | 1 hr 30 min |         |
| QC - Box and whisker                             | 1 s          | 19 s       | 44 s        | 1 min 12 s  | 1 min 29 s  |         |
| QC - Histogram                                   | 1 s          | 16 s       | 39 s        | 1 min 14 s  | 1 min 28 s  |         |
| QC - Total Reads                                 | 1 s          | 2 s        | 5 s         | 9 s         | 12 s        |         |
| Correlation matrix                               | 1 s          | 4 s        | 5 s         | 8 s         | 10 s        | 2       |
| Dimensionality reduction plots                   | 1 s          | 1 s        | 3 s         | 4 s         | 5 s         |         |
| Overview                                         | 1 s          | 1 s        | 1 s         | 1 s         | 1 s         | 3       |
| Gene expression                                  | 1 s          | 3 s        | 4 s         | 4 s         | 5 s         | 4       |
| DGE by cluster                                   | 1 s          | 1 s        | 1 s         | 1 s         | 1 s         |         |
| Custom DGE                                       | 2 s          | 16 s       | 6 s         | 3 min 21 s  | 3 min 45 s  | 5       |
| Volcano plot                                     | 1 s          | 1 s        | 1 s         | 1 s         | 1 s         |         |
| Heatmap                                          | 2 s          | 45 s       | 1 min 8 s   | 1 min 12 s  | 1 min 17 s  |         |
| GSE                                              | 1 s          | 1 s        | 1 s         | 1 s         | 1 s         |         |
| WGCNA                                            | 4 s          | 9 s        | 17 s        | 26 s        | 27 s        |         |
| iPSC Profiler                                    | 1 s          | 7 s        | 26 s        | 1 min 3 s   | 1 min 10 s  |         |

**Table S1. In-app benchmarking, related to figure 2.**

Discrete analysis steps in SEQUIN were time-stamped with five scRNA datasets of increasing size. Comments: 1. Pre-computed clusters; 2. Default 2000 genes and 500 cells; 3. Clusters and metadata similar times; 4. By cluster and cell distribution similar times; 5. First two-group comparison option: IS020\_WA09 had 105 DE genes, IS006\_WA09 had 2987, and IS006\_11 had 2993.
